# Supplementary material for: Identification of microRNAs differentially expressed in glioblastoma stem-like cells and their association with patient survival
Source: PubMed Central journal article supplement (PMC5809429; doi:10.1038/s41598-018-20929-6), 2018-02-12
Supplement: 41598_2018_20929_MOESM1_ESM.pdf [file 41598_2018_20929_MOESM1_ESM.pdf]

# Identification of microRNAs differentially expressed in glioblastoma stem-like cells and their association with patient survival

Jiri Sana, Petr Busek, Pavel Fadrus, Andrej Besse, Lenka Radova, Marek Vecera, Stefan Reguli, Lucie Sromova, Marek Hilser, Radim Lipina, Radek Lakomy, Leos Kren, Martin Smrcka, Aleksi Sedo, Ondrej Slaby

Supplementary Figure S1

**qRT-PCR quantification of nestin expression in GBM cells propagated in serum free (DMEM/F12) and serum containing (DMEM+FBS) media.** The p value signifies the statistical significance of the difference between the paired primary cell lines as assessed by the Wilcoxon paired test.

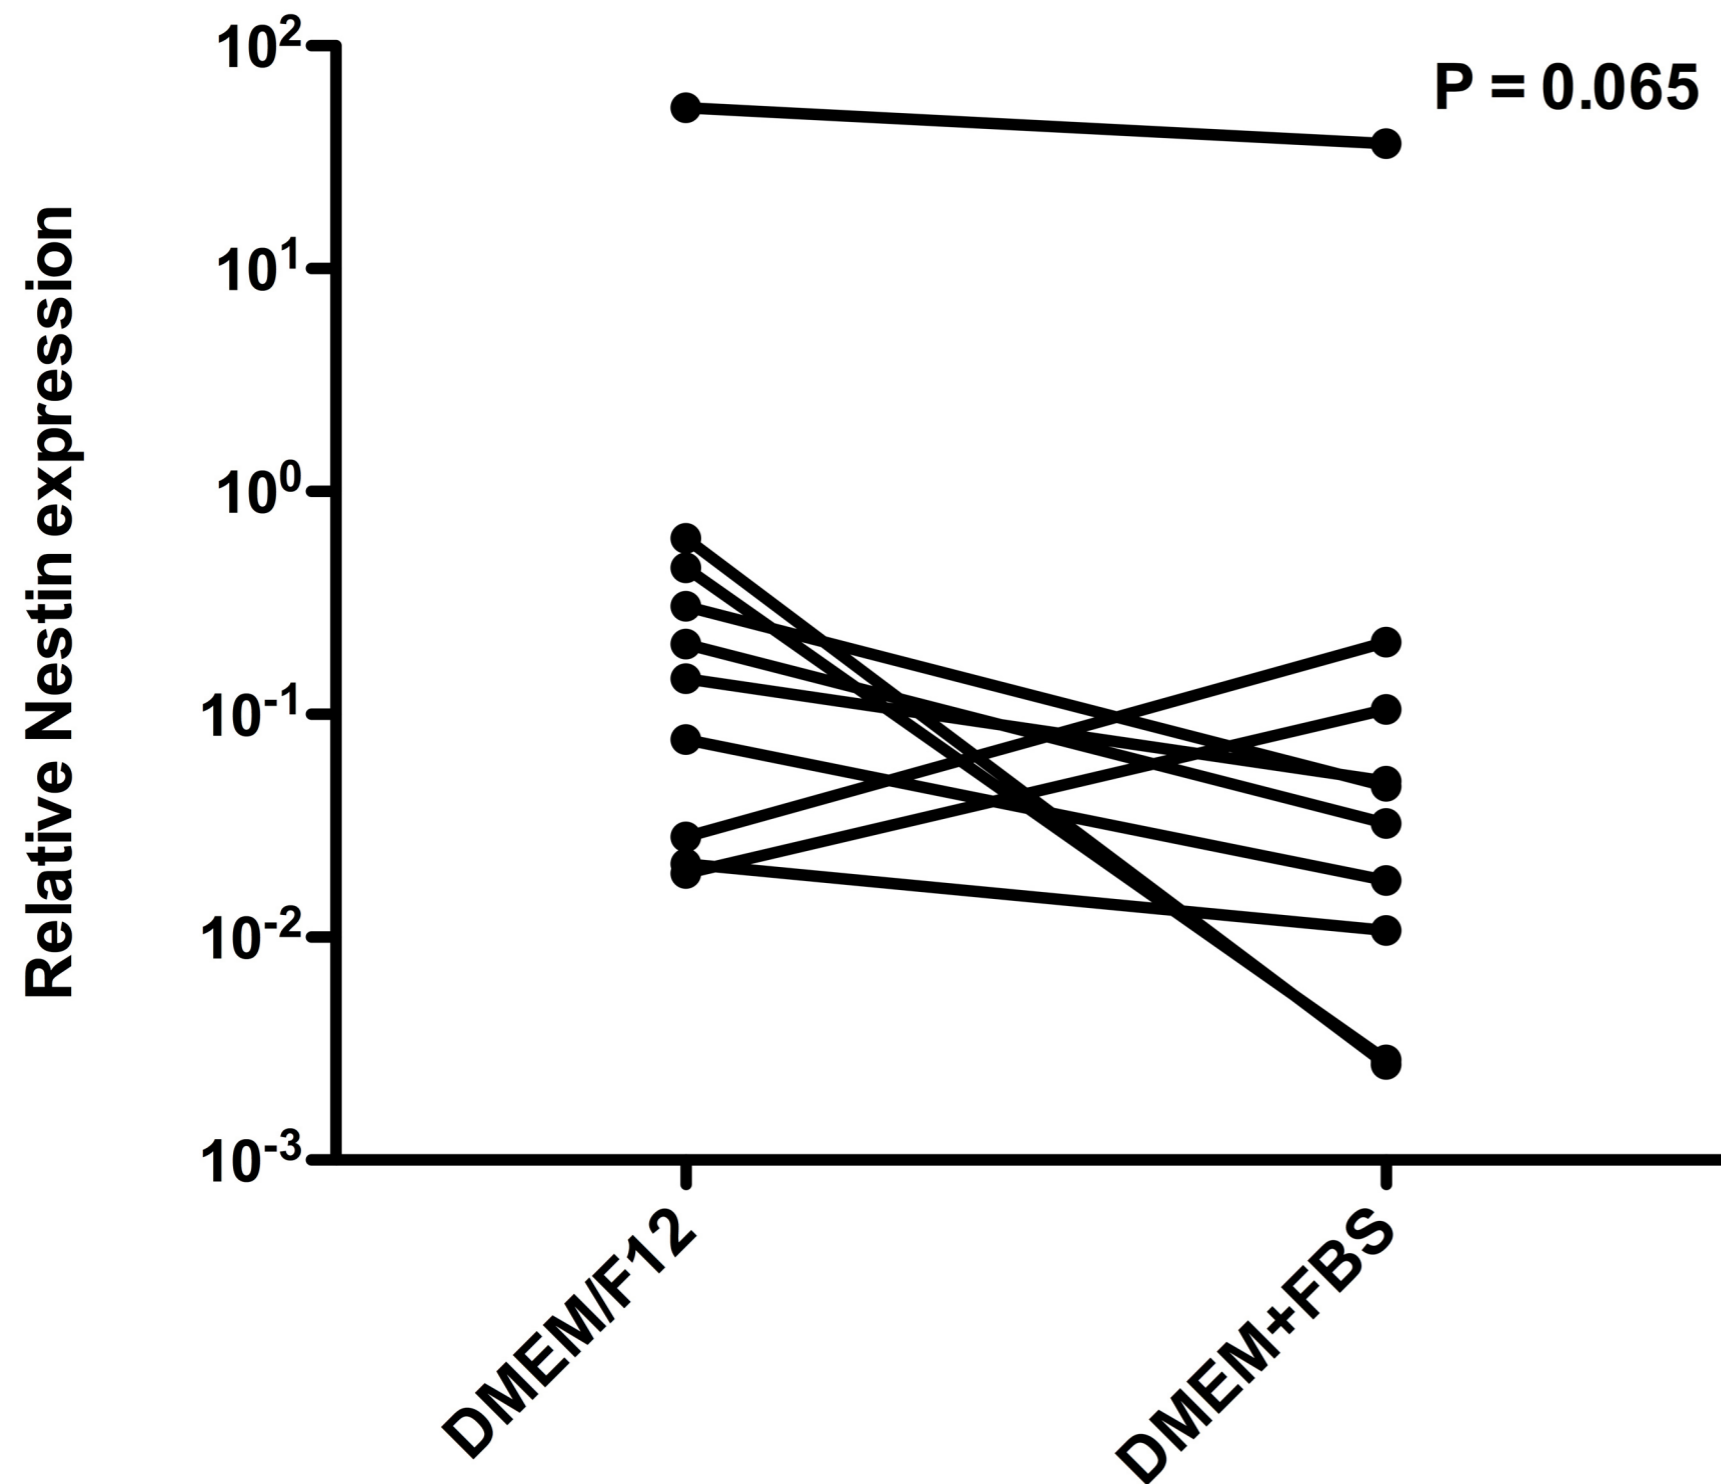

Supplementary Figure S2 Kaplan-Meier survival curves estimating OS in GBM patients from the TCGA data set according to the 7-miRNA based Risk Score. A) IDH1 wild-type patients (n = 280), B) IDH1 mutated patients (n = 16).

**A**

**IDH1 unmutated**

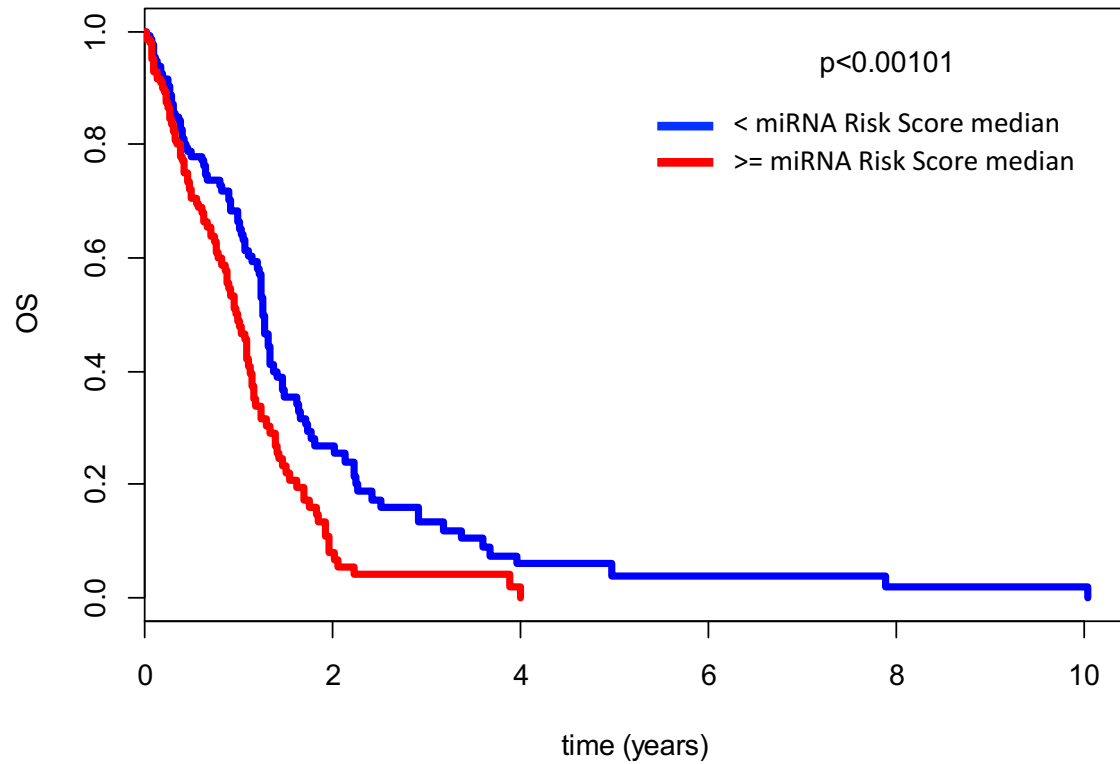

HR=1.61  
95%CI (1.21 - 2.15)

**B**

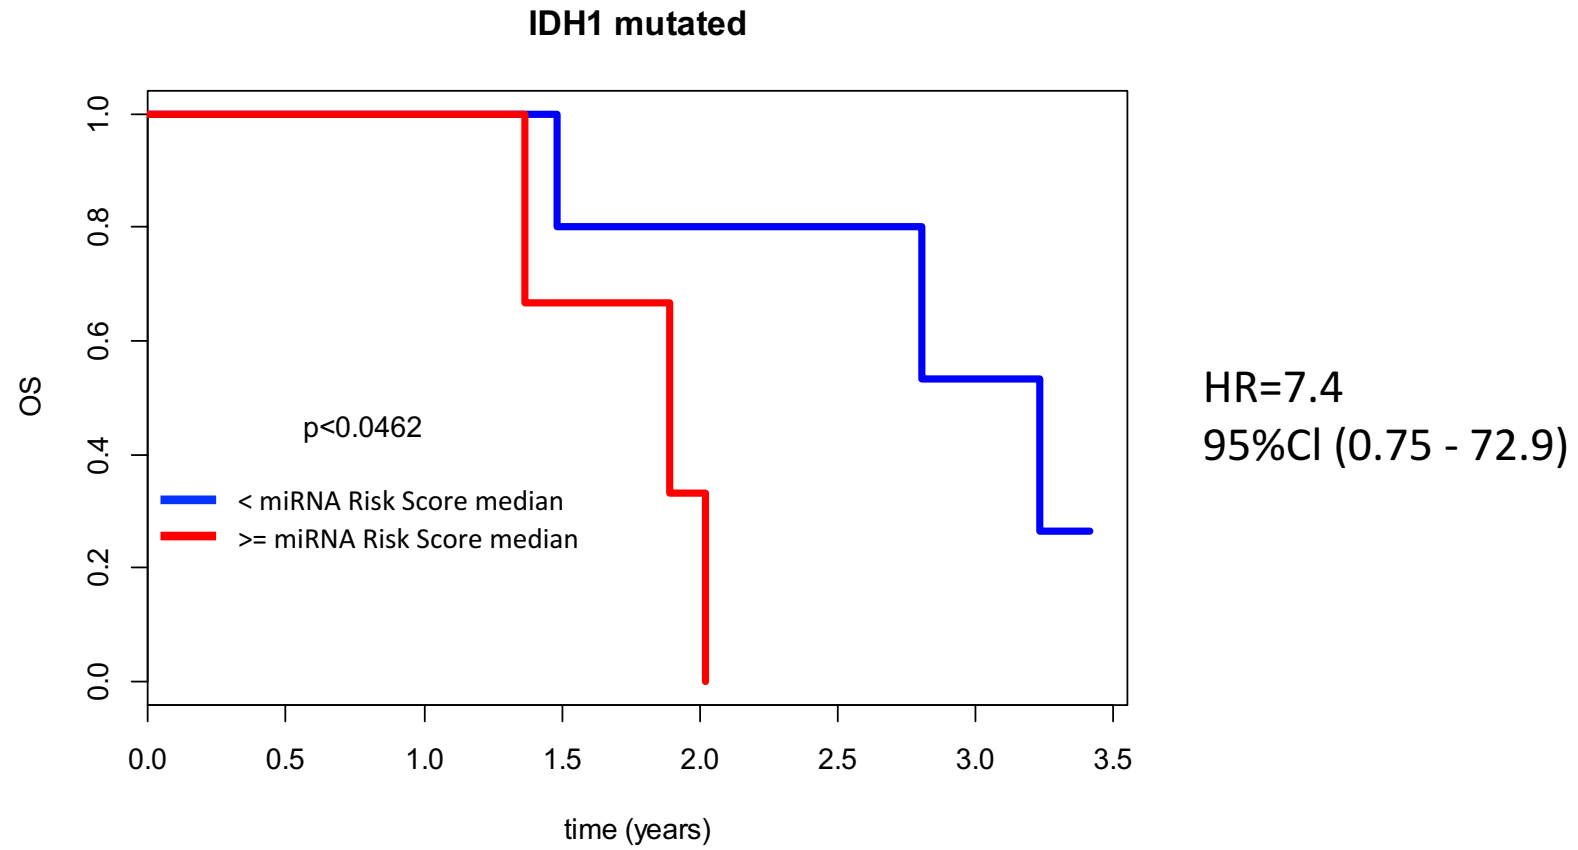

Supplementary Table S1  
**Characteristics of the primary cell cultures used in the study**

| Cell culture code | miRNA cluster | Cell culture type     | Multilineage differentiation of GSC cultures | Tumorigenicity in nude mice | Percentage of CD133+ cells (flow cytometry) | Age | Sex | IDH1 | IDH2 |
|-------------------|---------------|-----------------------|----------------------------------------------|-----------------------------|---------------------------------------------|-----|-----|------|------|
| 1A                | IB            | GSC culture           | No                                           | Nontumorigenic              | 79                                          | 73  | F   | wt   | wt   |
| 2A                | IA            | GSC culture           | Yes                                          | Tumorigenic                 | 99                                          | 63  | M   | wt   | wt   |
| 3A                | IA            | GSC culture           | n.d.                                         | Tumorigenic                 | 76                                          | 52  | M   | wt   | wt   |
| 4A                | IA            | GSC culture           | Yes                                          | Tumorigenic                 | 93                                          | 72  | M   | wt   | wt   |
| 5A                | IB            | GSC culture           | No                                           | Tumorigenic                 | 60                                          | 62  | M   | wt   | wt   |
| 6A                | IA            | GSC culture           | Yes                                          | Tumorigenic                 | 97                                          | 78  | M   | wt   | wt   |
| 7A                | IA            | GSC culture           | Yes                                          | Tumorigenic                 | 85                                          | 58  | F   | wt   | wt   |
| 8A                | IB            | GSC culture           | No                                           | Tumorigenic                 | 87                                          | 63  | M   | wt   | wt   |
| 10A               | IB            | GSC culture           | n.d.                                         | n.d.                        | n.d.                                        | 67  | M   | wt   | wt   |
| 11A               | IA            | GSC culture           | n.d.                                         | n.d.                        | n.d.                                        | 65  | M   | wt   | wt   |
| 1B                | IB            | Non-stem cell culture |                                              | Nontumorigenic              | n.d.                                        | 73  | F   | wt   | wt   |
| 2B                | II            | Non-stem cell culture |                                              | Tumorigenic                 | 33                                          | 63  | M   | wt   | wt   |
| 3B                | II            | Non-stem cell culture |                                              | Tumorigenic                 | 8                                           | 52  | M   | wt   | wt   |
| 4B                | II            | Non-stem cell culture |                                              | Tumorigenic                 | n.d.                                        | 72  | M   | wt   | wt   |
| 5B                | II            | Non-stem cell culture |                                              | Nontumorigenic              | n.d.                                        | 62  | M   | wt   | wt   |

|     |    |                       |  |             |      |    |          |           |           |
|-----|----|-----------------------|--|-------------|------|----|----------|-----------|-----------|
| 6B  | II | Non-stem cell culture |  | Tumorigenic | n.d. | 78 | <i>M</i> | <i>wt</i> | <i>wt</i> |
| 7B  | II | Non-stem cell culture |  | Tumorigenic | 3    | 58 | <i>F</i> | <i>wt</i> | <i>wt</i> |
| 8B  | IB | Non-stem cell culture |  | Tumorigenic | n.d. | 63 | <i>M</i> | <i>wt</i> | <i>wt</i> |
| 10B | II | Non-stem cell culture |  | n.d.        | n.d. | 67 | <i>M</i> | <i>wt</i> | <i>wt</i> |
| 11B | II | Non-stem cell culture |  | n.d.        | n.d. | 65 | <i>M</i> | <i>wt</i> | <i>wt</i> |

n.d.- not determined

wt- wild-type

Supplementary Table S2

**Significantly deregulated miRNAs in glioma stem-like cell (GSC) cultures in comparison with non-stem glioblastoma cell cultures (P < 0.05; LIMMA Analysis)**

| <b>microRNA</b> | <b>log2FC</b> | <b>Average Expression</b> | <b>P value</b> |
|-----------------|---------------|---------------------------|----------------|
| hsa-miR-124-3p  | 5,5           | 4,20                      | 1,5E-05        |
| hsa-miR-9-3p    | 4,8           | 3,87                      | 1,8E-05        |
| hsa-miR-4497    | -1,8          | 10,97                     | 2,8E-05        |
| hsa-miR-1260b   | -1,4          | 4,52                      | 3,3E-05        |
| hsa-miR-3195    | -2,4          | 5,28                      | 6,8E-05        |
| hsa-miR-4656    | -1,0          | 3,58                      | 1,0E-04        |
| hsa-miR-3178    | -1,5          | 9,54                      | 1,4E-04        |
| hsa-miR-652-3p  | 2,5           | 3,41                      | 1,6E-04        |
| hsa-miR-378h    | -1,0          | 3,41                      | 2,1E-04        |
| hsa-miR-204-3p  | 2,9           | 2,66                      | 2,2E-04        |
| hsa-miR-106b-5p | 2,2           | 8,82                      | 2,4E-04        |
| hsa-miR-1233-5p | -1,1          | 5,45                      | 2,5E-04        |
| hsa-miR-4632-5p | -1,4          | 5,48                      | 2,8E-04        |
| hsa-miR-16-5p   | 1,2           | 10,52                     | 3,1E-04        |
| hsa-miR-1207-5p | -1,1          | 6,21                      | 3,2E-04        |
| hsa-miR-4505    | -1,4          | 6,05                      | 3,3E-04        |
| hsa-miR-22-3p   | -1,8          | 8,42                      | 3,4E-04        |
| hsa-miR-92b-3p  | 2,3           | 8,01                      | 3,6E-04        |
| hsa-miR-3663-3p | -1,9          | 4,73                      | 3,7E-04        |
| hsa-miR-23a-3p  | -1,0          | 11,33                     | 4,0E-04        |
| hsa-miR-20b-5p  | 3,0           | 4,83                      | 4,0E-04        |
| hsa-miR-93-5p   | 2,1           | 9,07                      | 4,1E-04        |
| hsa-miR-93-3p   | 3,1           | 3,48                      | 4,4E-04        |
| hsa-miR-24-3p   | -0,6          | 10,58                     | 4,6E-04        |
| hsa-miR-6852-5p | 0,4           | 0,85                      | 5,1E-04        |
| hsa-miR-5787    | -1,2          | 9,50                      | 5,8E-04        |
| hsa-miR-25-3p   | 2,4           | 6,13                      | 5,9E-04        |
| hsa-miR-130b-3p | 2,6           | 6,62                      | 6,1E-04        |
| hsa-miR-6827-3p | -0,3          | 0,80                      | 6,3E-04        |
| hsa-miR-3180    | -1,8          | 4,93                      | 6,3E-04        |
| hsa-miR-1250-5p | 0,4           | 1,00                      | 7,2E-04        |
| hsa-miR-4674    | -1,3          | 7,87                      | 7,5E-04        |
| hsa-miR-935     | 3,0           | 3,19                      | 7,7E-04        |
| hsa-miR-660-5p  | 1,9           | 2,48                      | 8,1E-04        |
| hsa-miR-345-5p  | 3,0           | 4,57                      | 8,1E-04        |
| hsa-miR-27a-3p  | -1,1          | 9,03                      | 8,4E-04        |

|                 |      |       |         |
|-----------------|------|-------|---------|
| hsa-miR-4690-5p | -1,1 | 4,45  | 8,4E-04 |
| hsa-miR-1180-3p | 2,1  | 3,64  | 8,5E-04 |
| hsa-miR-4739    | -1,3 | 7,42  | 8,5E-04 |
| hsa-miR-128-3p  | 2,2  | 2,80  | 8,6E-04 |
| hsa-miR-3609    | 1,7  | 3,71  | 8,7E-04 |
| hsa-miR-100-5p  | -1,3 | 10,21 | 9,1E-04 |
| hsa-miR-1301-3p | 1,9  | 2,26  | 9,1E-04 |
| hsa-miR-133a-5p | 0,2  | 0,86  | 9,1E-04 |
| hsa-miR-425-5p  | 1,3  | 6,47  | 9,3E-04 |
| hsa-miR-26a-5p  | 1,2  | 10,49 | 9,4E-04 |
| hsa-miR-26b-3p  | -0,3 | 0,84  | 9,5E-04 |
| hsa-miR-328-5p  | -1,2 | 7,36  | 9,6E-04 |
| hsa-miR-106b-3p | 2,8  | 4,91  | 9,7E-04 |
| hsa-miR-3141    | -0,9 | 7,25  | 9,7E-04 |
| hsa-miR-221-3p  | -1,3 | 9,72  | 9,9E-04 |
| hsa-miR-455-5p  | 1,4  | 1,87  | 1,1E-03 |
| hsa-miR-149-5p  | 3,6  | 5,05  | 1,1E-03 |
| hsa-miR-6865-5p | -1,2 | 3,22  | 1,2E-03 |
| hsa-miR-3620-5p | -1,0 | 6,16  | 1,2E-03 |
| hsa-miR-574-3p  | -2,5 | 6,23  | 1,2E-03 |
| hsa-miR-6771-5p | -1,2 | 5,87  | 1,3E-03 |
| hsa-miR-193b-3p | -1,3 | 6,12  | 1,3E-03 |
| hsa-miR-346     | 2,1  | 2,66  | 1,3E-03 |
| hsa-miR-550a-5p | 0,6  | 1,71  | 1,3E-03 |
| hsa-miR-4634    | -1,5 | 4,64  | 1,4E-03 |
| hsa-miR-6765-5p | -1,4 | 7,49  | 1,4E-03 |
| hsa-miR-762     | -1,3 | 9,20  | 1,5E-03 |
| hsa-miR-550a-3p | 1,6  | 2,33  | 1,5E-03 |
| hsa-miR-25-5p   | 1,4  | 3,17  | 1,5E-03 |
| hsa-miR-328-3p  | 1,7  | 2,92  | 1,5E-03 |
| hsa-miR-331-3p  | 2,1  | 2,41  | 1,6E-03 |
| hsa-miR-4523    | -0,3 | 0,94  | 1,6E-03 |
| hsa-miR-188-5p  | 0,5  | 1,72  | 1,6E-03 |
| hsa-miR-6743-5p | -1,1 | 7,25  | 1,6E-03 |
| hsa-miR-6858-5p | -1,0 | 7,50  | 1,7E-03 |
| hsa-miR-503-5p  | 1,4  | 4,74  | 1,7E-03 |
| hsa-miR-1271-5p | 2,0  | 4,09  | 1,8E-03 |
| hsa-miR-320a    | 1,0  | 10,28 | 1,8E-03 |
| hsa-miR-4281    | -1,4 | 7,61  | 1,8E-03 |
| hsa-miR-5189-5p | -1,2 | 3,49  | 1,9E-03 |
| hsa-miR-103a-3p | 1,8  | 10,00 | 1,9E-03 |
| hsa-miR-23a-5p  | -1,7 | 2,71  | 1,9E-03 |
| hsa-miR-542-5p  | 2,0  | 2,82  | 1,9E-03 |
| hsa-miR-4745-5p | -1,3 | 8,65  | 2,0E-03 |
| hsa-miR-4749-5p | -1,1 | 4,83  | 2,0E-03 |
| hsa-miR-6126    | -1,9 | 6,45  | 2,0E-03 |
| hsa-miR-324-5p  | 2,4  | 4,95  | 2,0E-03 |
| hsa-miR-107     | 1,7  | 9,54  | 2,0E-03 |

|                 |      |       |         |
|-----------------|------|-------|---------|
| hsa-miR-30c-5p  | 1,2  | 6,85  | 2,1E-03 |
| hsa-miR-342-3p  | 2,1  | 7,14  | 2,1E-03 |
| hsa-miR-3591-3p | -0,4 | 0,89  | 2,2E-03 |
| hsa-miR-6816-5p | -1,2 | 8,74  | 2,2E-03 |
| hsa-miR-421     | 2,5  | 2,76  | 2,3E-03 |
| hsa-miR-6085    | -0,9 | 5,82  | 2,3E-03 |
| hsa-miR-6752-5p | -1,2 | 6,21  | 2,4E-03 |
| hsa-miR-885-5p  | 1,7  | 2,21  | 2,5E-03 |
| hsa-miR-6778-5p | -1,0 | 4,75  | 2,6E-03 |
| hsa-miR-153-3p  | 1,6  | 1,91  | 2,6E-03 |
| hsa-miR-4492    | -1,1 | 6,87  | 2,6E-03 |
| hsa-miR-663a    | -1,1 | 8,80  | 2,6E-03 |
| hsa-miR-8075    | -1,2 | 8,28  | 2,6E-03 |
| hsa-miR-320c    | 0,9  | 9,94  | 2,7E-03 |
| hsa-miR-106a-5p | 1,1  | 8,92  | 2,7E-03 |
| hsa-miR-7109-5p | -0,8 | 3,00  | 2,8E-03 |
| hsa-miR-200c-5p | 0,3  | 0,90  | 2,8E-03 |
| hsa-miR-3621    | -1,1 | 7,14  | 2,8E-03 |
| hsa-miR-6084    | -0,3 | 1,18  | 2,8E-03 |
| hsa-miR-6732-5p | -1,1 | 7,86  | 2,9E-03 |
| hsa-miR-181a-5p | 1,5  | 9,24  | 2,9E-03 |
| hsa-miR-4763-3p | -1,2 | 7,66  | 2,9E-03 |
| hsa-miR-6775-5p | -0,7 | 7,20  | 3,0E-03 |
| hsa-miR-6756-5p | -0,9 | 5,95  | 3,0E-03 |
| hsa-miR-17-5p   | 1,0  | 9,11  | 3,0E-03 |
| hsa-miR-1231    | -1,8 | 4,99  | 3,1E-03 |
| hsa-miR-495-3p  | 1,6  | 2,09  | 3,1E-03 |
| hsa-miR-8071    | 1,4  | 2,37  | 3,1E-03 |
| hsa-miR-551b-3p | 1,7  | 1,80  | 3,2E-03 |
| hsa-miR-301a-3p | 2,2  | 2,19  | 3,3E-03 |
| hsa-miR-9-5p    | 2,1  | 1,87  | 3,3E-03 |
| hsa-miR-134-3p  | 0,7  | 1,45  | 3,3E-03 |
| hsa-miR-320b    | 0,9  | 10,14 | 3,3E-03 |
| hsa-miR-6786-5p | -1,1 | 8,96  | 3,4E-03 |
| hsa-miR-3180-3p | -1,4 | 5,38  | 3,4E-03 |
| hsa-miR-1184    | -0,9 | 3,64  | 3,5E-03 |
| hsa-miR-193a-5p | -2,0 | 5,53  | 3,5E-03 |
| hsa-miR-181a-3p | 1,8  | 2,62  | 3,5E-03 |
| hsa-miR-6805-5p | -1,1 | 8,21  | 3,7E-03 |
| hsa-miR-411-3p  | 0,6  | 1,71  | 3,7E-03 |
| hsa-miR-4508    | -1,0 | 9,33  | 3,8E-03 |
| hsa-miR-339-3p  | 1,5  | 3,70  | 3,9E-03 |
| hsa-miR-6880-5p | -0,9 | 3,64  | 3,9E-03 |
| hsa-miR-195-5p  | 2,0  | 6,19  | 4,0E-03 |
| hsa-miR-1228-5p | -1,2 | 8,30  | 4,0E-03 |
| hsa-miR-4707-5p | -1,2 | 7,92  | 4,3E-03 |
| hsa-miR-1909-3p | -1,4 | 4,64  | 4,4E-03 |
| hsa-miR-200c-3p | 0,5  | 1,24  | 4,4E-03 |



|                  |      |       |         |
|------------------|------|-------|---------|
| hsa-miR-339-5p   | 1,6  | 4,54  | 4,4E-03 |
| hsa-miR-4459     | -0,8 | 6,54  | 4,4E-03 |
| hsa-miR-210-3p   | -1,3 | 6,03  | 4,5E-03 |
| hsa-miR-6511b-5p | -0,9 | 4,82  | 4,6E-03 |
| hsa-miR-320d     | 0,9  | 7,89  | 4,7E-03 |
| hsa-miR-29a-3p   | -1,5 | 8,35  | 4,8E-03 |
| hsa-miR-99b-3p   | 1,1  | 2,73  | 4,8E-03 |
| hsa-miR-6803-5p  | -1,0 | 8,31  | 5,0E-03 |
| hsa-miR-182-5p   | 4,2  | 5,22  | 5,1E-03 |
| hsa-miR-15b-5p   | 0,8  | 8,04  | 5,1E-03 |
| hsa-miR-543      | 2,0  | 3,03  | 5,1E-03 |
| hsa-miR-297      | 1,0  | 1,59  | 5,2E-03 |
| hsa-miR-10b-5p   | 1,8  | 3,01  | 5,3E-03 |
| hsa-miR-1976     | -0,3 | 1,04  | 5,4E-03 |
| hsa-miR-30d-5p   | 1,7  | 4,70  | 5,4E-03 |
| hsa-miR-361-5p   | 0,6  | 8,24  | 5,4E-03 |
| hsa-miR-324-3p   | 1,9  | 4,17  | 5,4E-03 |
| hsa-miR-130a-3p  | 1,8  | 6,02  | 5,4E-03 |
| hsa-miR-18b-5p   | 1,9  | 2,12  | 5,6E-03 |
| hsa-miR-6791-5p  | -1,1 | 8,22  | 5,7E-03 |
| hsa-miR-514a-3p  | -0,3 | 0,76  | 5,7E-03 |
| hsa-miR-497-5p   | 2,3  | 3,40  | 5,8E-03 |
| hsa-miR-4485     | -1,3 | 4,00  | 5,8E-03 |
| hsa-miR-4486     | -1,2 | 5,29  | 5,9E-03 |
| hsa-miR-1237-5p  | -1,1 | 9,78  | 5,9E-03 |
| hsa-miR-4687-3p  | -1,0 | 8,75  | 6,1E-03 |
| hsa-miR-6749-5p  | -0,7 | 5,66  | 6,1E-03 |
| hsa-miR-487a-3p  | 2,3  | 3,62  | 6,2E-03 |
| hsa-miR-4463     | -1,0 | 6,07  | 6,4E-03 |
| hsa-miR-6894-5p  | -0,6 | 1,86  | 6,4E-03 |
| hsa-miR-4298     | -1,0 | 7,37  | 6,4E-03 |
| hsa-miR-1469     | -1,1 | 9,47  | 6,4E-03 |
| hsa-miR-183-5p   | 2,7  | 2,76  | 6,5E-03 |
| hsa-miR-941      | 0,7  | 1,52  | 6,5E-03 |
| hsa-miR-377-3p   | 0,4  | 1,26  | 6,6E-03 |
| hsa-miR-6787-5p  | -1,0 | 4,72  | 6,7E-03 |
| hsa-miR-6789-5p  | -1,0 | 8,00  | 6,8E-03 |
| hsa-miR-145-5p   | -3,3 | 4,63  | 6,9E-03 |
| hsa-miR-2277-5p  | -0,8 | 3,97  | 6,9E-03 |
| hsa-miR-760      | 0,6  | 1,27  | 7,0E-03 |
| hsa-miR-4442     | -0,2 | 1,06  | 7,1E-03 |
| hsa-miR-6722-3p  | -0,9 | 6,67  | 7,2E-03 |
| hsa-miR-222-3p   | -0,9 | 10,40 | 7,3E-03 |
| hsa-miR-3940-5p  | -1,1 | 8,93  | 7,4E-03 |
| hsa-miR-769-5p   | 1,0  | 1,90  | 7,6E-03 |
| hsa-miR-181c-3p  | 0,9  | 1,39  | 7,6E-03 |
| hsa-miR-195-3p   | 0,5  | 1,11  | 7,7E-03 |
| hsa-miR-4784     | -0,3 | 1,24  | 7,8E-03 |

|                   |      |       |         |
|-------------------|------|-------|---------|
| hsa-miR-30a-3p    | 1,6  | 3,26  | 8,0E-03 |
| hsa-miR-6850-5p   | -1,0 | 8,29  | 8,0E-03 |
| hsa-miR-30a-5p    | 2,4  | 5,36  | 8,0E-03 |
| hsa-miR-3196      | -0,9 | 10,19 | 8,1E-03 |
| hsa-miR-4665-5p   | -1,3 | 4,33  | 8,1E-03 |
| hsa-miR-18a-5p    | 1,6  | 5,52  | 8,1E-03 |
| hsa-miR-4532      | -1,2 | 5,96  | 8,2E-03 |
| hsa-miR-3656      | -1,0 | 9,16  | 8,3E-03 |
| hsa-miR-342-5p    | 0,5  | 1,39  | 8,4E-03 |
| hsa-miR-655-3p    | -0,2 | 1,10  | 8,4E-03 |
| hsa-miR-619-5p    | 1,9  | 4,73  | 8,5E-03 |
| hsa-miR-6808-5p   | -0,6 | 2,65  | 8,5E-03 |
| hsa-miR-6132      | -1,0 | 3,00  | 8,6E-03 |
| hsa-miR-215-5p    | -0,2 | 0,91  | 8,7E-03 |
| hsa-miR-1915-5p   | 0,3  | 0,99  | 9,1E-03 |
| hsa-miR-3672      | -0,3 | 0,95  | 9,2E-03 |
| hsa-miR-6807-5p   | 0,9  | 1,36  | 9,3E-03 |
| hsa-miR-7854-3p   | 0,2  | 1,04  | 9,3E-03 |
| hsa-miR-550a-3-5p | 0,6  | 1,53  | 9,4E-03 |
| hsa-miR-2909      | -0,2 | 0,82  | 9,4E-03 |
| hsa-miR-127-5p    | 1,0  | 2,09  | 9,4E-03 |
| hsa-miR-204-5p    | 2,0  | 2,02  | 9,5E-03 |
| hsa-miR-6800-5p   | -1,1 | 8,64  | 9,7E-03 |
| hsa-miR-3200-3p   | 1,0  | 1,71  | 9,8E-03 |
| hsa-miR-181d-5p   | 1,8  | 3,35  | 9,9E-03 |
| hsa-miR-3667-3p   | -0,5 | 1,09  | 1,0E-02 |
| hsa-miR-34a-5p    | -0,8 | 7,01  | 1,0E-02 |
| hsa-miR-532-5p    | 1,8  | 4,90  | 1,0E-02 |
| hsa-miR-887-3p    | 0,9  | 1,48  | 1,0E-02 |
| hsa-miR-376a-3p   | 1,4  | 2,38  | 1,0E-02 |
| hsa-miR-4797-5p   | 0,3  | 1,12  | 1,1E-02 |
| hsa-miR-4709-3p   | 0,3  | 0,99  | 1,1E-02 |
| hsa-miR-4638-3p   | 0,4  | 1,09  | 1,1E-02 |
| hsa-miR-409-5p    | 1,8  | 3,24  | 1,1E-02 |
| hsa-miR-149-3p    | -1,0 | 8,80  | 1,1E-02 |
| hsa-miR-4649-5p   | -1,3 | 5,11  | 1,1E-02 |
| hsa-miR-519d-5p   | -0,3 | 0,83  | 1,1E-02 |
| hsa-miR-485-3p    | 2,1  | 3,78  | 1,1E-02 |
| hsa-miR-6794-5p   | -0,9 | 5,22  | 1,1E-02 |
| hsa-miR-4785      | -0,6 | 1,90  | 1,1E-02 |
| hsa-miR-758-5p    | 0,4  | 1,19  | 1,1E-02 |
| hsa-miR-323a-3p   | 1,1  | 1,40  | 1,1E-02 |
| hsa-miR-181b-5p   | 1,8  | 7,96  | 1,1E-02 |
| hsa-miR-127-3p    | 3,2  | 6,32  | 1,2E-02 |
| hsa-miR-4286      | 0,8  | 1,97  | 1,2E-02 |
| hsa-miR-589-3p    | 0,7  | 1,77  | 1,2E-02 |
| hsa-miR-488-5p    | -0,2 | 0,90  | 1,2E-02 |
| hsa-miR-1185-2-3p | 2,1  | 3,59  | 1,2E-02 |

|                  |      |      |         |
|------------------|------|------|---------|
| hsa-miR-2861     | -1,1 | 9,28 | 1,2E-02 |
| hsa-miR-1225-5p  | -1,3 | 3,09 | 1,2E-02 |
| hsa-miR-6879-5p  | -0,7 | 4,02 | 1,2E-02 |
| hsa-miR-362-5p   | 1,9  | 3,14 | 1,2E-02 |
| hsa-miR-1245a    | -0,2 | 0,90 | 1,2E-02 |
| hsa-miR-433-3p   | 1,9  | 2,83 | 1,2E-02 |
| hsa-miR-425-3p   | 1,1  | 1,90 | 1,2E-02 |
| hsa-miR-4270     | -0,7 | 6,75 | 1,2E-02 |
| hsa-miR-194-3p   | 0,2  | 0,94 | 1,2E-02 |
| hsa-miR-4507     | -0,9 | 4,74 | 1,2E-02 |
| hsa-miR-424-3p   | 1,6  | 4,36 | 1,3E-02 |
| hsa-miR-194-5p   | 1,1  | 2,90 | 1,3E-02 |
| hsa-miR-2110     | -0,6 | 1,59 | 1,3E-02 |
| hsa-miR-181c-5p  | 1,4  | 2,24 | 1,3E-02 |
| hsa-miR-4516     | -1,2 | 9,62 | 1,4E-02 |
| hsa-miR-6724-5p  | -1,0 | 9,11 | 1,4E-02 |
| hsa-miR-320e     | 1,4  | 5,14 | 1,4E-02 |
| hsa-miR-548g-3p  | -0,2 | 0,84 | 1,4E-02 |
| hsa-miR-8072     | -0,9 | 9,29 | 1,4E-02 |
| hsa-miR-1275     | -1,1 | 4,58 | 1,4E-02 |
| hsa-miR-19b-3p   | 0,7  | 7,31 | 1,5E-02 |
| hsa-miR-597-3p   | -0,2 | 0,88 | 1,5E-02 |
| hsa-miR-183-3p   | 1,3  | 1,80 | 1,5E-02 |
| hsa-miR-6769b-5p | -0,4 | 4,19 | 1,5E-02 |
| hsa-miR-1227-5p  | -1,1 | 6,77 | 1,5E-02 |
| hsa-miR-363-3p   | 2,2  | 2,01 | 1,5E-02 |
| hsa-miR-148b-5p  | -0,3 | 0,91 | 1,5E-02 |
| hsa-miR-4734     | -1,0 | 8,36 | 1,6E-02 |
| hsa-miR-545-5p   | -0,3 | 0,75 | 1,6E-02 |
| hsa-miR-494-3p   | 2,6  | 5,79 | 1,6E-02 |
| hsa-miR-4327     | -0,3 | 1,05 | 1,6E-02 |
| hsa-miR-6879-3p  | 0,2  | 0,96 | 1,6E-02 |
| hsa-miR-7108-5p  | -0,9 | 8,54 | 1,6E-02 |
| hsa-miR-5001-5p  | -0,9 | 7,66 | 1,6E-02 |
| hsa-miR-6821-5p  | -1,0 | 7,51 | 1,6E-02 |
| hsa-miR-330-3p   | 0,6  | 1,69 | 1,7E-02 |
| hsa-miR-23b-3p   | -0,5 | 9,90 | 1,7E-02 |
| hsa-miR-766-5p   | 0,3  | 0,94 | 1,7E-02 |
| hsa-let-7d-5p    | 0,8  | 8,84 | 1,7E-02 |
| hsa-miR-3185     | -1,2 | 7,16 | 1,7E-02 |
| hsa-miR-3200-5p  | 0,5  | 1,46 | 1,7E-02 |
| hsa-miR-5009-3p  | -0,3 | 0,89 | 1,7E-02 |
| hsa-miR-4429     | 1,2  | 5,84 | 1,8E-02 |
| hsa-miR-4695-5p  | -0,8 | 6,03 | 1,8E-02 |
| hsa-miR-4750-5p  | -0,9 | 4,21 | 1,8E-02 |
| hsa-miR-4511     | -0,2 | 0,87 | 1,8E-02 |
| hsa-miR-548o-3p  | -0,2 | 0,82 | 1,8E-02 |
| hsa-miR-638      | -0,9 | 9,98 | 1,8E-02 |

|                   |      |       |         |
|-------------------|------|-------|---------|
| hsa-miR-30b-5p    | 1,5  | 4,95  | 1,9E-02 |
| hsa-miR-4488      | -1,0 | 10,22 | 1,9E-02 |
| hsa-miR-4689      | -1,0 | 4,13  | 1,9E-02 |
| hsa-miR-378a-3p   | -1,4 | 6,33  | 1,9E-02 |
| hsa-miR-1908-5p   | -0,9 | 9,43  | 2,0E-02 |
| hsa-miR-6877-3p   | 1,0  | 1,42  | 2,0E-02 |
| hsa-miR-154-5p    | 0,9  | 1,99  | 2,0E-02 |
| hsa-miR-4440      | 1,1  | 2,06  | 2,0E-02 |
| hsa-miR-939-3p    | -0,2 | 0,87  | 2,0E-02 |
| hsa-miR-758-3p    | 0,9  | 1,90  | 2,0E-02 |
| hsa-miR-138-1-3p  | -1,7 | 2,92  | 2,0E-02 |
| hsa-miR-584-5p    | 0,6  | 1,26  | 2,1E-02 |
| hsa-miR-4793-3p   | 0,9  | 2,01  | 2,1E-02 |
| hsa-miR-6727-5p   | -0,9 | 10,18 | 2,1E-02 |
| hsa-miR-219a-1-3p | 0,2  | 0,91  | 2,1E-02 |
| hsa-miR-3124-5p   | -0,8 | 2,38  | 2,1E-02 |
| hsa-miR-6812-5p   | -0,8 | 5,84  | 2,2E-02 |
| hsa-miR-7641      | -1,0 | 4,85  | 2,2E-02 |
| hsa-let-7d-3p     | 0,6  | 1,58  | 2,2E-02 |
| hsa-miR-3119      | -0,2 | 0,79  | 2,2E-02 |
| hsa-miR-20b-3p    | 0,8  | 1,16  | 2,2E-02 |
| hsa-miR-6845-5p   | -0,7 | 1,63  | 2,2E-02 |
| hsa-miR-6826-3p   | -0,2 | 1,02  | 2,3E-02 |
| hsa-miR-4721      | -0,9 | 2,24  | 2,3E-02 |
| hsa-miR-15a-5p    | 1,5  | 5,32  | 2,3E-02 |
| hsa-miR-410-3p    | 0,4  | 1,45  | 2,3E-02 |
| hsa-miR-4498      | -0,8 | 3,40  | 2,3E-02 |
| hsa-miR-3689a-5p  | -0,3 | 0,84  | 2,3E-02 |
| hsa-miR-3689b-5p  | -0,3 | 0,84  | 2,3E-02 |
| hsa-miR-3689e     | -0,3 | 0,84  | 2,3E-02 |
| hsa-miR-376b-3p   | 0,5  | 1,34  | 2,3E-02 |
| hsa-miR-1185-1-3p | 1,8  | 3,99  | 2,4E-02 |
| hsa-miR-4501      | -0,2 | 0,92  | 2,5E-02 |
| hsa-miR-31-3p     | -0,7 | 1,40  | 2,5E-02 |
| hsa-miR-338-5p    | 0,3  | 1,09  | 2,5E-02 |
| hsa-let-7c-5p     | 0,5  | 10,60 | 2,5E-02 |
| hsa-miR-6828-5p   | -0,2 | 0,84  | 2,5E-02 |
| hsa-miR-154-3p    | 0,7  | 1,40  | 2,6E-02 |
| hsa-miR-423-3p    | 0,5  | 7,35  | 2,6E-02 |
| hsa-miR-125b-2-3p | 1,2  | 3,00  | 2,7E-02 |
| hsa-miR-500a-5p   | 1,3  | 3,14  | 2,7E-02 |
| hsa-miR-591       | -0,2 | 0,85  | 2,7E-02 |
| hsa-miR-6754-5p   | -0,4 | 1,24  | 2,7E-02 |
| hsa-miR-374b-3p   | -0,2 | 0,89  | 2,7E-02 |
| hsa-miR-3679-3p   | -0,2 | 1,13  | 2,7E-02 |
| hsa-miR-3675-5p   | 0,2  | 0,94  | 2,7E-02 |
| hsa-miR-7847-3p   | -0,9 | 8,12  | 2,7E-02 |
| hsa-miR-615-3p    | 1,1  | 2,08  | 2,7E-02 |

|                  |      |       |         |
|------------------|------|-------|---------|
| hsa-miR-6869-5p  | -0,9 | 10,53 | 2,7E-02 |
| hsa-miR-3960     | -0,6 | 11,82 | 2,8E-02 |
| hsa-miR-4640-5p  | -0,6 | 2,26  | 2,8E-02 |
| hsa-miR-4668-5p  | -0,7 | 10,04 | 2,8E-02 |
| hsa-miR-6788-5p  | 0,1  | 0,92  | 2,8E-02 |
| hsa-miR-3907     | 0,4  | 1,15  | 2,8E-02 |
| hsa-miR-1268b    | -0,6 | 4,30  | 2,8E-02 |
| hsa-miR-329-3p   | 1,0  | 1,73  | 2,9E-02 |
| hsa-miR-3671     | -0,3 | 0,86  | 2,9E-02 |
| hsa-miR-4664-3p  | 0,2  | 0,92  | 2,9E-02 |
| hsa-miR-187-5p   | -0,3 | 1,20  | 2,9E-02 |
| hsa-miR-134-5p   | 2,1  | 4,88  | 3,0E-02 |
| hsa-miR-138-5p   | -2,6 | 6,09  | 3,0E-02 |
| hsa-miR-4466     | -0,8 | 10,49 | 3,0E-02 |
| hsa-miR-150-3p   | -0,9 | 1,96  | 3,0E-02 |
| hsa-miR-3187-3p  | -0,8 | 3,65  | 3,0E-02 |
| hsa-miR-548ay-5p | -0,2 | 0,90  | 3,1E-02 |
| hsa-miR-6502-5p  | -0,2 | 0,96  | 3,1E-02 |
| hsa-miR-1268a    | -0,7 | 4,67  | 3,1E-02 |
| hsa-miR-370-5p   | 0,3  | 1,06  | 3,2E-02 |
| hsa-miR-4502     | 0,5  | 1,27  | 3,2E-02 |
| hsa-miR-379-5p   | 2,2  | 5,16  | 3,2E-02 |
| hsa-miR-6729-5p  | -0,7 | 10,36 | 3,2E-02 |
| hsa-miR-21-3p    | -0,8 | 2,29  | 3,2E-02 |
| hsa-miR-374c-3p  | -0,2 | 0,98  | 3,2E-02 |
| hsa-miR-503-3p   | 0,4  | 0,91  | 3,3E-02 |
| hsa-miR-191-5p   | 0,4  | 9,58  | 3,3E-02 |
| hsa-miR-3685     | 0,2  | 1,06  | 3,3E-02 |
| hsa-miR-409-3p   | 2,2  | 5,71  | 3,3E-02 |
| hsa-miR-19a-3p   | 0,6  | 2,16  | 3,3E-02 |
| hsa-miR-4481     | 0,4  | 1,53  | 3,3E-02 |
| hsa-miR-148b-3p  | 1,0  | 1,53  | 3,4E-02 |
| hsa-miR-192-5p   | 0,7  | 1,88  | 3,4E-02 |
| hsa-miR-8062     | -0,2 | 0,81  | 3,4E-02 |
| hsa-miR-370-3p   | 1,7  | 3,85  | 3,4E-02 |
| hsa-miR-4490     | -0,4 | 1,23  | 3,4E-02 |
| hsa-miR-18a-3p   | 0,6  | 1,33  | 3,4E-02 |
| hsa-miR-99a-5p   | 0,9  | 8,02  | 3,4E-02 |
| hsa-miR-3613-3p  | -0,6 | 10,40 | 3,4E-02 |
| hsa-miR-4677-5p  | -0,2 | 0,82  | 3,5E-02 |
| hsa-miR-148a-3p  | 1,1  | 2,13  | 3,5E-02 |
| hsa-miR-6820-5p  | -0,8 | 3,14  | 3,5E-02 |
| hsa-miR-6750-5p  | -0,6 | 4,30  | 3,5E-02 |
| hsa-miR-3664-5p  | -0,2 | 0,80  | 3,6E-02 |
| hsa-miR-6502-3p  | -0,2 | 0,85  | 3,6E-02 |
| hsa-miR-7704     | -0,8 | 11,26 | 3,6E-02 |
| hsa-miR-199a-5p  | -1,8 | 3,52  | 3,6E-02 |
| hsa-miR-3940-3p  | 0,3  | 1,19  | 3,6E-02 |

|                   |      |       |         |
|-------------------|------|-------|---------|
| hsa-miR-1297      | -0,2 | 0,91  | 3,7E-02 |
| hsa-miR-29b-2-5p  | 0,2  | 0,99  | 3,7E-02 |
| hsa-miR-143-3p    | -2,4 | 3,70  | 3,7E-02 |
| hsa-miR-5188      | -0,3 | 1,15  | 3,7E-02 |
| hsa-miR-4484      | -1,5 | 6,04  | 3,7E-02 |
| hsa-miR-1913      | -0,2 | 1,20  | 3,8E-02 |
| hsa-miR-4671-3p   | -0,2 | 0,80  | 3,8E-02 |
| hsa-let-7g-5p     | 1,3  | 5,53  | 3,8E-02 |
| hsa-miR-3925-5p   | 0,2  | 0,96  | 3,8E-02 |
| hsa-miR-769-3p    | 0,6  | 1,29  | 3,8E-02 |
| hsa-miR-6089      | -0,7 | 11,38 | 3,9E-02 |
| hsa-miR-4266      | -0,2 | 0,87  | 3,9E-02 |
| hsa-miR-4723-3p   | -0,2 | 0,87  | 3,9E-02 |
| hsa-miR-132-3p    | 1,5  | 4,99  | 4,0E-02 |
| hsa-miR-4731-5p   | -0,3 | 1,06  | 4,0E-02 |
| hsa-miR-432-5p    | 1,9  | 4,53  | 4,0E-02 |
| hsa-miR-604       | -0,2 | 0,84  | 4,1E-02 |
| hsa-miR-3131      | -0,2 | 1,07  | 4,1E-02 |
| hsa-miR-214-3p    | -1,8 | 3,79  | 4,1E-02 |
| hsa-miR-8059      | -0,2 | 0,83  | 4,2E-02 |
| hsa-miR-6798-5p   | -0,9 | 4,69  | 4,2E-02 |
| hsa-miR-596       | -0,2 | 0,99  | 4,2E-02 |
| hsa-miR-628-3p    | 0,2  | 1,03  | 4,2E-02 |
| hsa-miR-410-5p    | -0,2 | 0,93  | 4,2E-02 |
| hsa-miR-500a-3p   | 1,2  | 4,40  | 4,3E-02 |
| hsa-miR-937-5p    | -0,7 | 5,28  | 4,3E-02 |
| hsa-miR-126-3p    | 0,7  | 2,00  | 4,3E-02 |
| hsa-miR-331-5p    | 0,4  | 1,10  | 4,3E-02 |
| hsa-miR-1915-3p   | -0,7 | 10,24 | 4,3E-02 |
| hsa-miR-30b-3p    | 0,3  | 1,07  | 4,3E-02 |
| hsa-miR-1245b-5p  | -0,2 | 0,82  | 4,4E-02 |
| hsa-miR-602       | -0,9 | 3,85  | 4,4E-02 |
| hsa-miR-1343-5p   | -0,9 | 6,60  | 4,4E-02 |
| hsa-miR-31-5p     | -1,7 | 3,99  | 4,4E-02 |
| hsa-miR-96-5p     | 0,7  | 1,31  | 4,5E-02 |
| hsa-miR-6860      | -0,6 | 2,71  | 4,5E-02 |
| hsa-miR-766-3p    | 0,6  | 2,13  | 4,5E-02 |
| hsa-miR-203b-5p   | -0,2 | 0,81  | 4,5E-02 |
| hsa-miR-6088      | -0,7 | 10,12 | 4,5E-02 |
| hsa-miR-744-5p    | 1,0  | 6,34  | 4,6E-02 |
| hsa-miR-668-5p    | -0,6 | 2,77  | 4,6E-02 |
| hsa-miR-3074-3p   | 0,3  | 0,98  | 4,6E-02 |
| hsa-miR-4651      | -0,8 | 6,39  | 4,7E-02 |
| hsa-miR-598-5p    | 0,4  | 0,88  | 4,7E-02 |
| hsa-miR-550b-2-5p | 0,4  | 1,23  | 4,8E-02 |
| hsa-miR-20a-5p    | 0,7  | 8,20  | 4,8E-02 |
| hsa-miR-6764-3p   | -0,2 | 0,78  | 4,8E-02 |
| hsa-miR-4467      | -0,8 | 6,96  | 4,8E-02 |

|                 |      |      |         |
|-----------------|------|------|---------|
| hsa-miR-4462    | 0,4  | 1,57 | 4,9E-02 |
| hsa-miR-135b-3p | 0,3  | 0,87 | 4,9E-02 |
| hsa-miR-3134    | -0,2 | 1,03 | 4,9E-02 |
| hsa-miR-532-3p  | 1,3  | 3,77 | 4,9E-02 |
| hsa-miR-3646    | -0,2 | 1,06 | 4,9E-02 |
| hsa-miR-1252-5p | -0,2 | 0,95 | 4,9E-02 |
| hsa-miR-17-3p   | 0,5  | 2,03 | 4,9E-02 |
| hsa-miR-514b-3p | -0,3 | 0,79 | 4,9E-02 |
| hsa-miR-496     | 0,2  | 0,97 | 4,9E-02 |
| hsa-miR-7113-3p | -0,3 | 1,11 | 5,0E-02 |
| hsa-miR-4305    | -0,2 | 0,87 | 5,0E-02 |

Supplementary Table S3 **Univariate and multivariate Cox regression analyses of seven-miRNA signature and IDH1 status in relation to the OS in GBM patients (n = 296)**

|                       | univariate |      |        |      |                 | multivariate |      |        |      |                 |                 |
|-----------------------|------------|------|--------|------|-----------------|--------------|------|--------|------|-----------------|-----------------|
|                       | coef       | HR   | 95% HR |      | pvalue          | coef         | HR   | 95% HR |      | pvalue          | model pvalue    |
| seven-miRNA signature | 1,00       | 2,72 | 1,64   | 4,50 | <b>1,06E-04</b> | 0,89         | 2,44 | 1,46   | 4,08 | <b>6,53E-04</b> | <b>4,24E-05</b> |
| IDH1 status: mutated  | -1,16      | 0,31 | 0,14   | 0,71 | <b>3,30E-03</b> | -1,00        | 0,37 | 0,16   | 0,83 | <b>1,67E-02</b> |                 |
